# Supplementary material
Source: publisher figshare collection journal article supplement (https://acs.figshare.com/ndownloader/files/4668598)
Supplement: Supplementary file 1 [file 4668598]

## SUPPORTING INFORMATION

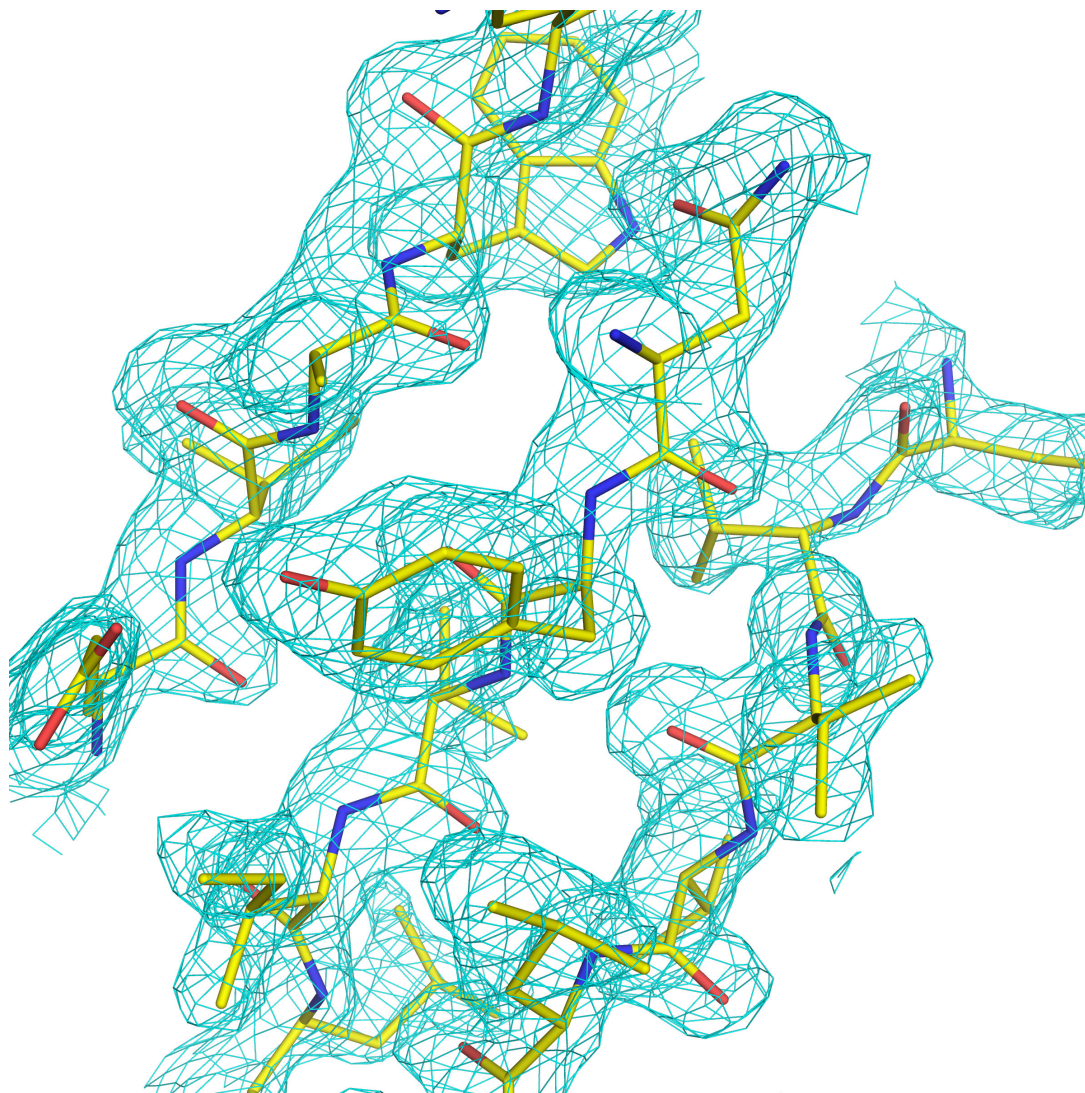

**Figure S1.** 2Fo-Fc electron density map calculated from experimental phases (contour level  $1.2\sigma$ ). The PaNip7 refined model is superposed to the experimental map, showing a region of the  $\beta 9$ ,  $\beta 8$  and  $\beta 10$  strands of the PUA (from left to right). Tyrosine 97 is shown in the center.
